# Supplementary material for: Comparative analysis of anti-viral transcriptomics reveals novel effects of influenza immune antagonism
Source: PubMed Central journal article supplement (PMC4536893; doi:10.1186/s12865-015-0107-y), 2015-08-14
Supplement: 12865_2015_107_MOESM2_ESM.pdf [file 12865_2015_107_MOESM2_ESM.pdf]

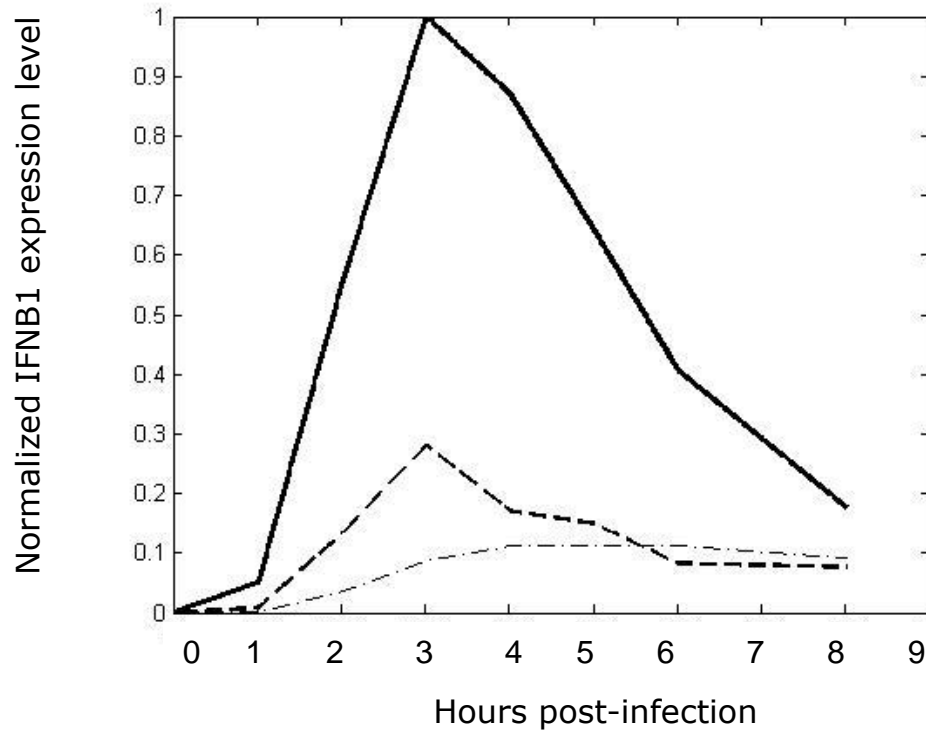

**Supplementary Figure 1: Normalized IFNB1 expression time course used in the ODE model.** IFNB1 mRNA levels were normalized by their highest value within each replicate. Values between measures points were determined by linear interpolation of their experimentally measured values at a MOI of 2 (thick solid line), 1 (thick dashed line) and 0.5 (thick dashed dot line).

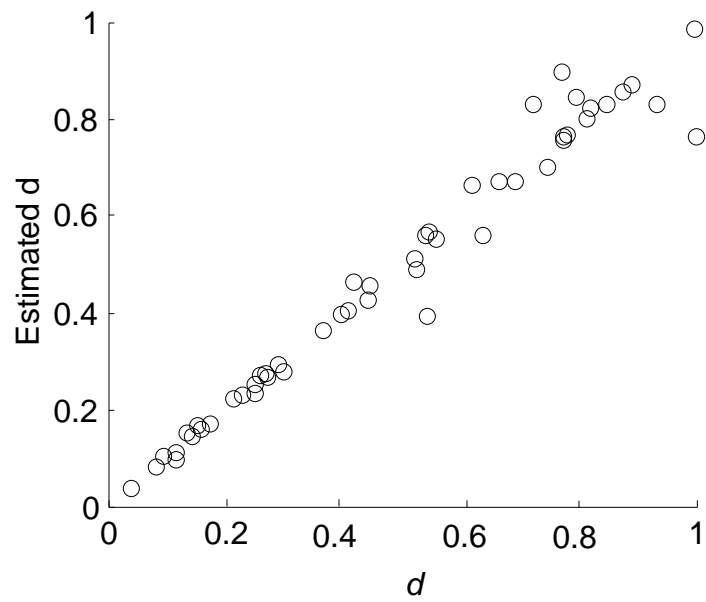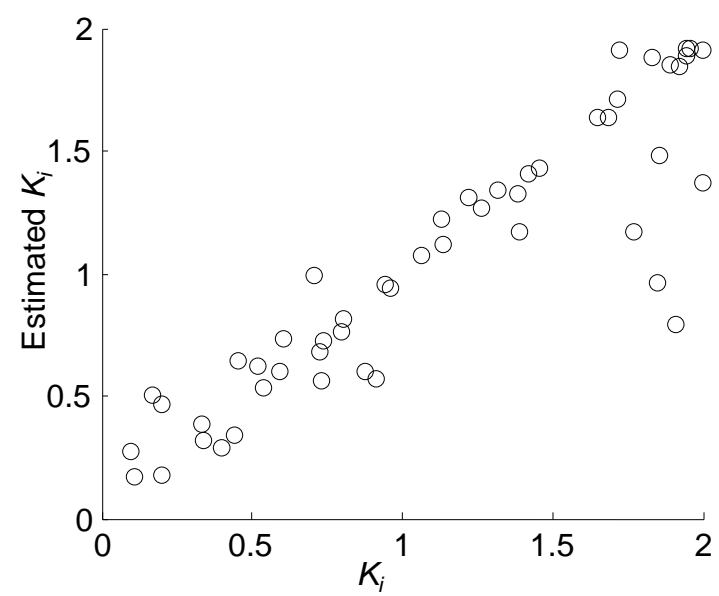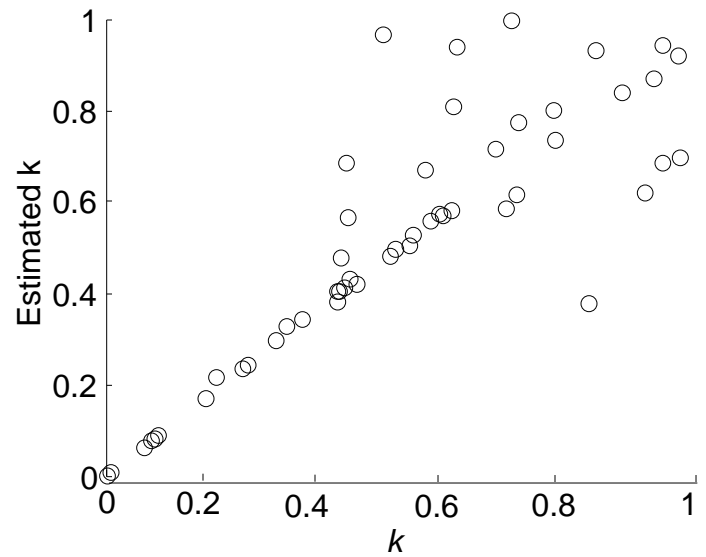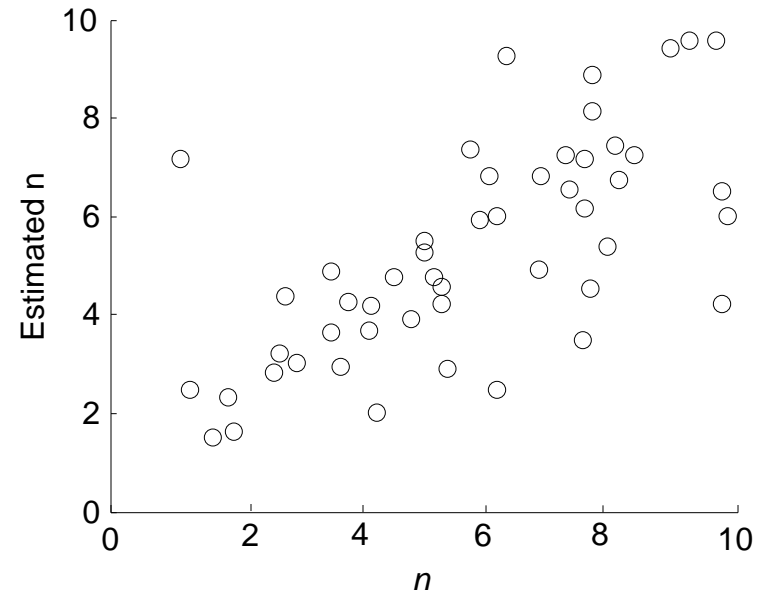

**Supplementary Figure 2: Identifiability of model parameters using the proposed estimation protocol.** As described in methods, simulated data sets were generated using a range of values for (A) degradation rate ( $d$ ), (B) rate of expression of gene by infected cells ( $k_i$ ), (C) the level of IFNB1 for which the gene expression rate is 0.5 per cell ( $k$ ), and (D) Hill coefficient ( $n$ ). Parameters were then estimated from these data and compared to their actual values.
